# Supplementary material for: Candida glabrata PHO4 Is Necessary and Sufficient for Pho2-Independent Transcription of Phosphate Starvation Genes
Source: Oxford University Press journal article supplement (doi:10.1534/genetics.109.101063), 2009-03-31
Supplement: figure_s1.pdf [file figure_s1.pdf]

|                         |     |                                                                                                             |     |
|-------------------------|-----|-------------------------------------------------------------------------------------------------------------|-----|
| Scer YFR034C/1-312      | 1   | MGR T T S E G I H - - - - -                                                                                 | 10  |
| Cgla CAGL0D05170g/1-533 | 1   | MGE Q V E D MDK - - - - -                                                                                   | 10  |
| Calb orf19.1253/1-659   | 1   | - M D Q Q V W N P I F S P S G T T P G K S P S Y Y N E L A P Q S Q S H I S N Q D P Q L P L Q T Q H H Q L     | 51  |
| Scer YFR034C/1-312      | 11  | - - - - - G F V D D L E P K S S I L D K V G D F I                                                           | 30  |
| Cgla CAGL0D05170g/1-533 | 11  | - - - - - L Y E T P I D M Q T T I F D Q V D N Y L                                                           | 30  |
| Calb orf19.1253/1-659   | 52  | F H I D G G S N H S T P S G N I Q L P S S S Q Q N T P H I V S N T P T A F A D S D Q V F L Q H M E M Y D     | 103 |
| Scer YFR034C/1-312      | 31  | T V N T K - - - - -                                                                                         | 35  |
| Cgla CAGL0D05170g/1-533 | 31  | H M V N S G L Q H D E K E D E H R - - - - -                                                                 | 47  |
| Calb orf19.1253/1-659   | 104 | N Q Q H T N Q S A G N T P G P I S F H N H N P N L Q Q A S Q Q P H Q H I S P H L N N L Q Q H S Q Q P Y Q     | 155 |
| Scer YFR034C/1-312      | 36  | - - - - - R H D G R - - - - -                                                                               | 40  |
| Cgla CAGL0D05170g/1-533 | 48  | - - - - - E H E D A I D - - - - -                                                                           | 54  |
| Calb orf19.1253/1-659   | 156 | H Q H S H S R S H I D S E A P S A N D T P T S S G A L G M A P Q P P L L S S T T N P Q S F D L G L D T I     | 207 |
| Scer YFR034C/1-312      | 41  | - - - - - E D F N E Q N D E L N S Q E N H N S S E N - - - - -                                               | 61  |
| Cgla CAGL0D05170g/1-533 | 55  | - - - - - G G A S L N M H L Y N I N D T L N G V S T D N G H F D M V D - - - - -                             | 84  |
| Calb orf19.1253/1-659   | 208 | G F I I P E E L N F D - - T D P N H I S S A F P P Q L P A - - D Q T P S L L A V D K L K Q L Q Q Q Q Q Q     | 255 |
| Scer YFR034C/1-312      | 62  | - - - - - G N E N E N E Q D S L A L D D L D R - - - - - A F E L V E G M D                                   | 88  |
| Cgla CAGL0D05170g/1-533 | 85  | - - - - - L H F G P T L T T D D D P T K M A E - L Q H T T I H H - - - - - G H L D V N G N R                 | 119 |
| Calb orf19.1253/1-659   | 256 | Q Q R Q Q D P L S E L S S P V L P G Q N D Q S Y N P H H Y Y H R Q S S S N S V F V A G K N T G S S V S A     | 307 |
| Scer YFR034C/1-312      | 89  | M D W M M P S H A H S P A T T A T I K P R - - - - - L L Y S P L I H T Q S - - - - -                         | 121 |
| Cgla CAGL0D05170g/1-533 | 120 | S D S L F S P F D S F L V H D T P S L E A R N S I Q L T N E G S T S A L T T P F L S G K N H Y D D H G N     | 171 |
| Calb orf19.1253/1-659   | 308 | P S Q H V R P D A V F T P L V S P V V A P L D I N G K A D K E N G N N S G G H N N S H S S S F S P - - - - - | 356 |
| Scer YFR034C/1-312      | 122 | - - - - - A V P V T I S P N L V A T - - - - -                                                               | 134 |
| Cgla CAGL0D05170g/1-533 | 172 | S I N S Q S F N Y H N R N S S L S K V S G K F S P I S - S P A L T S T - - - - -                             | 205 |
| Calb orf19.1253/1-659   | 357 | - - - Q P A V Q I S - - - - - F E P L T - S P A L N A E P S T I K S K G G K K N H K E T D                   | 392 |
| Scer YFR034C/1-312      | 135 | - - - - - A T S T T S A N K V T K N K S N - - - - - S S P Y L N K R - - - - - R G K P G                     | 163 |
| Cgla CAGL0D05170g/1-533 | 206 | N Q E Q Q H W N T S S R R A S N S S R S K R V L P S - G N S S V S S T S N K - - - - - V I K N S             | 248 |
| Calb orf19.1253/1-659   | 393 | D R R R S T S S A Y A P S K - D E N K Q Y K R R T P H - G T P I L Q G H T S N A T T V N G S G K P Y K S     | 442 |
| Scer YFR034C/1-312      | 164 | P D S A - - - - - T S L F E L P D S V I P T P - - - - -                                                     | 181 |
| Cgla CAGL0D05170g/1-533 | 249 | P Y M N A S S R R L Q K T I S N G N S K R D E W D E - F M F S L P E S S L A N D L T T G N D E N M D I S     | 299 |
| Calb orf19.1253/1-659   | 443 | P I T K N G K N - - - S Q - - - - K Q D F S F T N - Q F E K L P E S T I I V K S E P M E T S V E P P L       | 485 |
| Scer YFR034C/1-312      | 182 | - - - - - K P K P K P K - Q Y P K V I L P S N S - - - - -                                                   | 199 |
| Cgla CAGL0D05170g/1-533 | 300 | L P A G H S P T K E Y N S Y P K V I L P S H A A E N E S M E T D N Y E R A S L L E D S Q P D E T Q N N N     | 351 |
| Calb orf19.1253/1-659   | 486 | A P Q G Q Q Q D D S N P M L P P N G K P V - - E I T G A P L M G F T M G K L A E G G - - - - -               | 525 |
| Scer YFR034C/1-312      | 200 | T R R V S P V T A K T S S S A E G - - - - V V V A S E S P V I A P - - - - -                                 | 228 |
| Cgla CAGL0D05170g/1-533 | 352 | P Q N N N P H S N G S S I S P V G K N D S V M L A S G S P V I K P Q N S S S N I L Q T P Y S S K R V F K     | 403 |
| Calb orf19.1253/1-659   | 526 | A G T V A D K K S A K K A G A N N G K L - - - - S R K P S Y S K - - - - -                                   | 553 |
| Scer YFR034C/1-312      | 229 | - - - - - H G S S H S R S L S K R R S - - - - -                                                             | 242 |

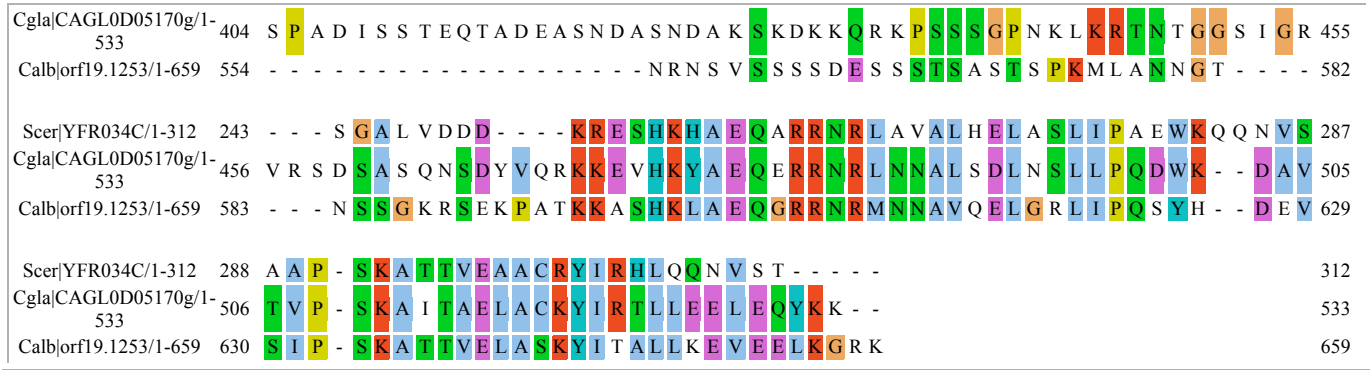

FIGURE S1.—Alignment of *ScPho4* with *CgPho4* and *CaPho4*. Utilizing a tree-assisted alignment of OG9983 which is the orthogroup of *Pho4*, we removed the other 16 species after CLUSTAL alignment, removed gaps common to all three proteins and colored residues according to the clustal option in Jalview. The most conserved portion of the proteins is in the C-terminal DNA binding domain. The known phosphorylation sites of *ScPho4* are surrounded by boxes.
