# Supplementary material for: Candida glabrata PHO4 Is Necessary and Sufficient for Pho2-Independent Transcription of Phosphate Starvation Genes
Source: Oxford University Press journal article supplement (doi:10.1534/genetics.109.101063), 2009-03-31
Supplement: figure_s2.pdf [file figure_s2.pdf]

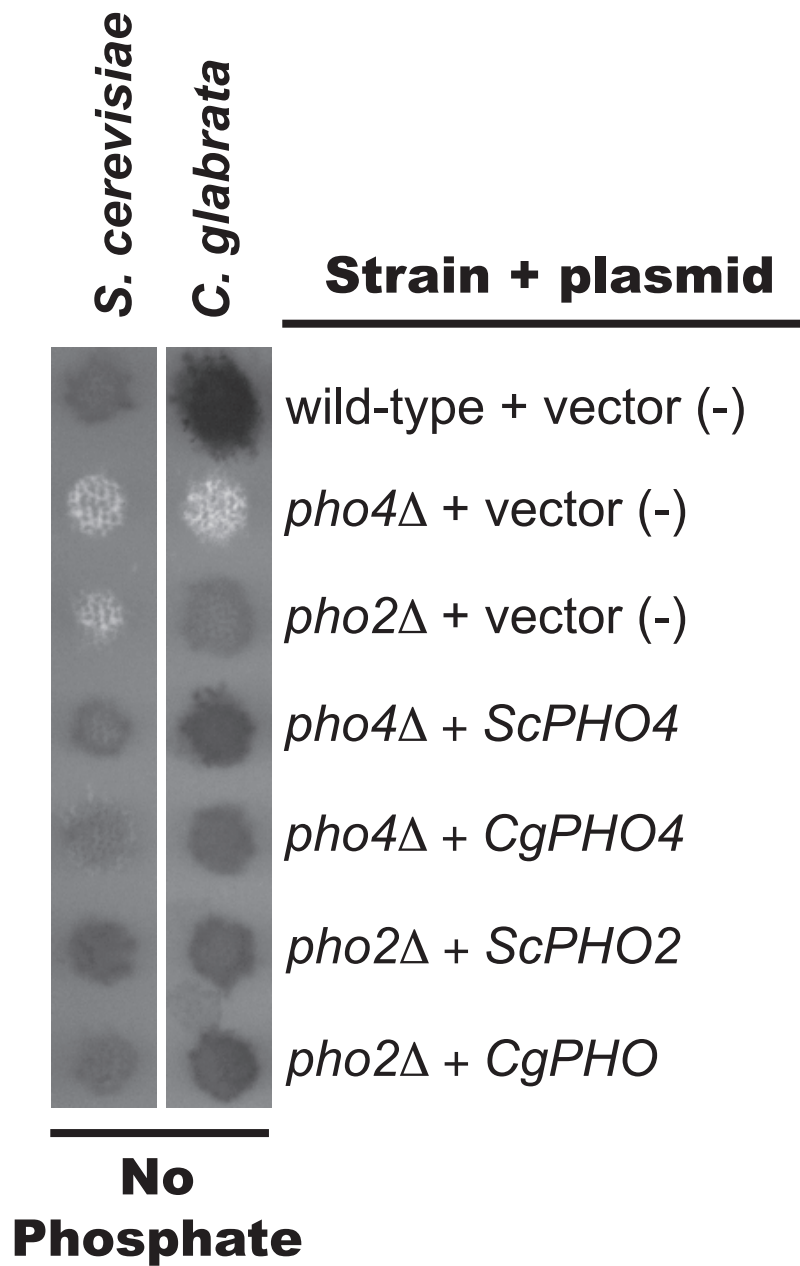

FIGURE S2.—Semi-quantitative phosphatase assay demonstrating that *PHO4* and *PHO2* plasmids are functional. *S. cerevisiae* and *C. glabrata* mutants lacking the Pho4 transcription factor (*pho4Δ*) contain either empty vector (pRS313), *ScPHO4*, or *CgPHO4* plasmids. *S. cerevisiae* and *C. glabrata* mutants lacking the Pho2 transcription factor (*pho2Δ*) contain either empty vector (pRS313), *ScPHO2*, or *CgPHO2* plasmids. These strains were grown on solid media lacking phosphate and overlaid with phosphatase substrate.
