# Supplementary material for: Candida glabrata PHO4 Is Necessary and Sufficient for Pho2-Independent Transcription of Phosphate Starvation Genes
Source: Oxford University Press journal article supplement (doi:10.1534/genetics.109.101063), 2009-03-31
Supplement: tables1.pdf [file tables1.pdf]

**TABLE S1****Primers used in this study**

| Primer | Sequence                                    | Purpose                                                   |
|--------|---------------------------------------------|-----------------------------------------------------------|
| OD16   | tgactgggattccgtgagacggac                    | Delete <i>C. glabrata</i> <i>PHO4</i> with <i>KANMX6</i>  |
| OD17   | ttaattaacccgggatccgacctgttcacccatcactaacag  |                                                           |
| OD18   | ctgttagtgatgggtgaacaggtcggatccccgggtaattaa  |                                                           |
| OD19   | gtttaaacgagctcgaattctacagatactccaagacaaaac  |                                                           |
| OD20   | gtttgtcttgagtatctgtagaattcgagctcgtttaaac    |                                                           |
| OD21   | atcttgtccctccaaacagaactg                    |                                                           |
| OD25   | gctcgctctccattgcctattgtag                   | Delete <i>C. glabrata</i> <i>PHO2</i> with <i>KANMX6</i>  |
| OD26   | ttaattaacccgggatccgccatccatttaactacaaagtggc |                                                           |
| OD27   | gccaaactttagttaaatggatggcggatccccgggtaattaa |                                                           |
| OD28   | gtttaaacgagctcgaattcgctacgaatattcatgtacat   |                                                           |
| OD29   | atgtacatgaatattcgtagcgaattcgagctcgtttaaac   |                                                           |
| OD30   | tccatccaatcttatccgggtgc                     |                                                           |
| O1     | gacagtcaaagtgtaaaggg                        | Delete <i>C. glabrata</i> <i>PHO31</i> with <i>KANMX6</i> |
| O2     | ttaattaacccgggatccgcagatattaccaaactcat      |                                                           |
| O3     | atgaagttggtaaatatctcggatccccgggtaattaa      |                                                           |
| O4     | GTTTAAACGAGCTCGAATTCgacgataaaaacctgatgctt   |                                                           |
| O5     | aagcatcaggtttttatcgtcGAATTCGAGCTCGTTTTAAAC  |                                                           |
| O6     | taatctagatcttcaaacgtc                       |                                                           |
| O7     | ctgcctggcttgggtggc                          |                                                           |
| O15    | caccagacatccttagtgat                        | Delete <i>C. glabrata</i> <i>PHO30</i> with <i>NATMX6</i> |
| O16    | ttaattaacccgggatccgctgagcatcttggggagtc      |                                                           |

|       |                                            |                                                                                                   |
|-------|--------------------------------------------|---------------------------------------------------------------------------------------------------|
| O17   | atgactccccaagatgctcagcggatccccgggtaattaa   |                                                                                                   |
| O18   | GTTTAAACGAGCTCGAATTCagcatatccttcatctata    |                                                                                                   |
| O19   | tatagatgaaggatatatctGAATTCGAGCTCGTTTAAAC   |                                                                                                   |
| O20   | cggtgaaatacacacctctg                       |                                                                                                   |
| O21   | cggtcaaaaactgattccag                       |                                                                                                   |
| O29   | ggcacttaagttaatatattc                      | Delete <i>C. glabrata</i> <i>MSN5</i> with <i>NATMX6</i>                                          |
| O30   | ttaattaaccggggatccgactggccaactctccttta     |                                                                                                   |
| O31   | taaaggagaagttggccagtcggatccccgggtaattaa    |                                                                                                   |
| O32   | GTTTAAACGAGCTCGAATTCctgatagcggctggcttc     |                                                                                                   |
| O33   | gaaccagccatcgctatcagGAATTCGAGCTCGTTTAAAC   |                                                                                                   |
| O34   | acacgagcaccataaatcca                       |                                                                                                   |
| O35   | atgaatgctggggctaatcaag                     |                                                                                                   |
| OD18  | ctgttagtgatgggtgaacaggtcggatccccgggtaattaa | Delete <i>C. glabrata</i> <i>PHO4</i> with <i>NATMX6</i> in DG3                                   |
| OD20  | gtttgtcttgagtatctgtagaattcgagctcgtttaaac   |                                                                                                   |
| DWO1  | CGATCGGCGGCCGCTGCATTATTTAGATCGGAAAAAGTC    | Amplify <i>S. cerevisiae</i> <i>PHO4</i> with 5' <i>NotI</i> and 3' <i>PacI</i> restriction sites |
| DWO2  | CGACACTTAATTAACGTGCTCACGTTCTGCTGTAGGTG     | for cloning into pRS313-13myc                                                                     |
| DWO7  | CGATCGGCGGCCGCGATGAGCTCTTTTCATCACTTCTCG    | Amplify <i>S. cerevisiae</i> <i>PHO2</i> with 5' <i>NotI</i> and 3' <i>PacI</i> restriction sites |
| DWO8  | CGACACTTAATTAATATCCATCTATGCTCGTCAGTTAG     | for cloning into pRS313-13myc                                                                     |
| DWO5  | CGATCGGCGGCCGCGTATGCATTACCTTCTCAATTAGG     | Amplify <i>C. glabrata</i> <i>PHO4</i> with 5' <i>NotI</i> and 3' <i>PacI</i> restriction sites   |
| DWO6  | CGACACTTAATTAATTTCTTGTACTGCTCAAGCTCTTCG    | for cloning into pRS313-13myc                                                                     |
| DWO11 | CGATCGGCGGCCGCGCAGCAACCACCTTGGCGTCTGCGC    | Amplify <i>C. glabrata</i> <i>PHO2</i> with 5' <i>NotI</i> and 3' <i>PacI</i> restriction sites   |
| DWO12 | CGACACTTAATTAATATCCAACGGTTGTCTTCGTTTAC     | for cloning into pRS313-13myc                                                                     |

|      |                                          |                                                                                                                                                  |
|------|------------------------------------------|--------------------------------------------------------------------------------------------------------------------------------------------------|
| O163 | CGATCGGCGGCCGCtgcattatttagatcgaaaaagtc   | Amplify <i>S. cerevisiae</i> <i>PHO4</i> with 5' <i>NotI</i> and 3' <i>PacI</i> restriction sites for cloning into pRS313-13myc, with stop codon |
| O164 | CGACACTTAATTAAtcacgtgctcagttctgctgtaggtg |                                                                                                                                                  |
| O128 | CGATCGGCGGCCGCtagtgaagccagtccttcacgcca   | Amplify <i>S. mikatae</i> <i>PHO4</i> with 5' <i>NotI</i> and 3' <i>PacI</i> restriction sites for cloning into pRS313-13myc, with stop codon    |
| O161 | CGACACTTAATTAAtcacgtgctccattccgtttagatga |                                                                                                                                                  |
| O174 | CGATCGGCGGCCGCaggtagaggaggaggcagag       | Amplify <i>S. castellii</i> <i>PHO4</i> with 5' <i>NotI</i> and 3' <i>PacI</i> restriction sites for cloning into pRS313-13myc, with stop codon  |
| O175 | CGACACTTAATTAAggaatttgcttagattcctaactg   |                                                                                                                                                  |
| O167 | CGATCGGCGGCCGCgtatgcattaccttctcaattagg   | Amplify <i>C. glabrata</i> <i>PHO4</i> with 5' <i>NotI</i> and 3' <i>PacI</i> restriction sites for cloning into pRS313-13myc, with stop codon   |
| O168 | CGACACTTAATTAAtcatttctgtactgctcaagctcttg |                                                                                                                                                  |
| O157 | CGATCGGCGGCCGCcagccatgtactcatgatactg     | Amplify <i>C. albicans</i> <i>PHO4</i> with 5' <i>NotI</i> and 3' <i>PacI</i> restriction sites for cloning into pRS313-13myc, with stop codon   |
| O158 | CGACACTTAATTAAAttacttctctcttcaactctcaac  |                                                                                                                                                  |
| O155 | TCCTACGAACTTCCAGATGGT                    | Quantify <i>S. cerevisiae</i> <i>ACT1</i> with quantitative reverse-transcription PCR                                                            |
| O156 | GGCAGATTCCAAAACCCAAAA                    |                                                                                                                                                  |
| O153 | GCCGGTTCCAAAACGTTTA                      | Quantify <i>S. cerevisiae</i> <i>PHO84</i> with quantitative reverse-transcription PCR                                                           |
| O154 | GACAGTGAAGACGGATACCCA                    |                                                                                                                                                  |
| O151 | TGCTTGTAACATCATGTCCTGC                   | Quantify <i>S. cerevisiae</i> <i>PHO5</i> with quantitative reverse-transcription PCR                                                            |
| O152 | TTGAGGTCAAGTTCAAACCCT                    |                                                                                                                                                  |
| O75  | gaccaaactacttacaactcc                    | Quantify <i>C. glabrata</i> <i>ACT1</i> with quantitative reverse-transcription PCR                                                              |
| O76  | ccactttcgctgattcttgcttg                  |                                                                                                                                                  |
| O78  | gccttgggtactctgatcgacc                   | Quantify <i>C. glabrata</i> <i>PHO84</i> with quantitative reverse-transcription PCR                                                             |
| O79a | gtgctgctcgcgacagtaac                     |                                                                                                                                                  |
| O81  | ggttaacgccacaccagtaagagc                 | Quantify <i>C. glabrata</i> <i>GIT1</i> with quantitative reverse-transcription PCR                                                              |
| O82  | gatagtgacaattcactctctc                   |                                                                                                                                                  |

---
